# Supplementary material
Source: PubMed Central journal article supplement (PMC4959220)
Supplement: AEM.01036-16_zam999117252so1.pdf [file AEM.01036-16_zam999117252so1.pdf]

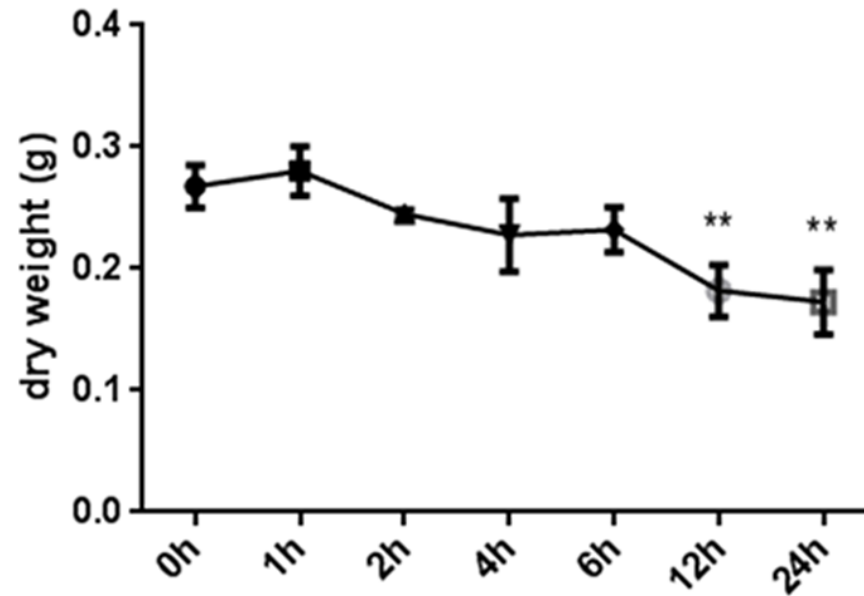

**Fig. S1** HS decreased the mycelial dry weight of *G. lucidum*.

The wild-type strains were cultured on PDA liquid cultures with shaking for 5 days and then exposed to 42 °C for 0 to 24 h and followed until the 7th day at 28 °C in stationary PDA liquid cultures. The mycelial dry weight in the heat-stressed strains was measured and subjected to statistical analysis. The values are the means  $\pm$  SD of three independent experiments. Asterisks indicate significant differences compared to untreated strains (Student's *t* test: \*\* $P < 0.01$ ).

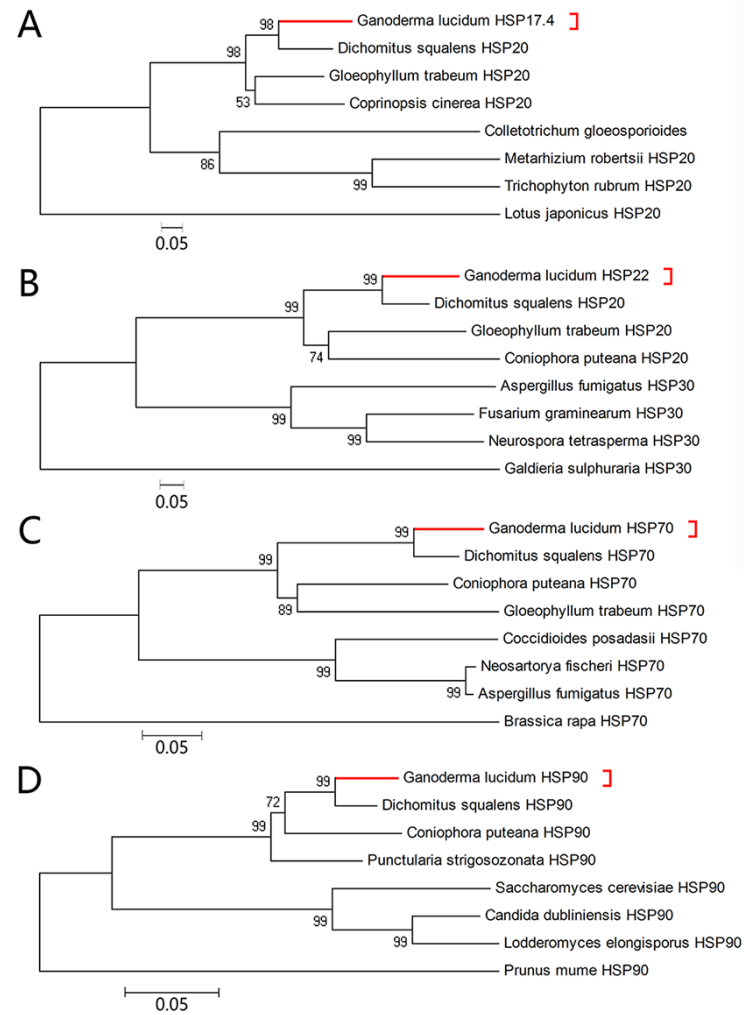

**Fig. S2** Phylogenetic analysis of HSP17.4, HSP22, HSP70 and HSP90.

The amino acid alignment and tree construction were performed using MEGA 5.1. A. Phylogenetic tree of HSP17.4 sequences. The GenBank accession numbers included *Ganoderma lucidum* (GL23242-R1), *Dichomitus squalens* (XP\_007369368), *Gloeophyllum trabeum* (XP\_007861096), *Coprinopsis cinerea* (XP\_001829984), *Metarhizium robertsii* (XP\_007826570), *Trichophyton rubrum* (KMQ44830), *Colletotrichum gloeosporioides* (XP\_007278592) and *Lotus japonicus* (AEO22030). B. Phylogenetic tree of HSP22 sequences. The GenBank accession numbers included *Ganoderma lucidum* (GL19532), *Dichomitus squalens* (XP\_007363953), *Gloeophyllum trabeum* (XP\_007866791), *Coniophora puteana* (XP\_007768211), *Fusarium graminearum* (XP\_011316926), *Aspergillus fumigatus* (XP\_754172), *Neurospora tetrasperma* (XP\_009856494) and *Galdieria sulphuraria* (XP\_005707918). C. Phylogenetic tree of HSP70 sequences. The GenBank accession numbers included *Ganoderma lucidum* (GL23436), *Dichomitus squalens* (XP\_007362246), *Coniophora puteana* (XP\_007767273), *Gloeophyllum trabeum* (XP\_007864074), *Coccidioides posadasii* (XP\_003070073) *Neosartorya fischeri* (XP\_001264502), *Aspergillus fumigatus* (XP\_752631), and *Brassica rapa* (XP\_009147592). D. Phylogenetic tree of HSP90 sequences. The GenBank accession numbers included *Ganoderma lucidum* (GL24667), *Dichomitus squalens* (XP\_007361188), *Coniophora puteana* (XP\_007764667), *Punctularia strigosozonata* (XP\_007385736), *Lodderomyces elongisporus* (XP\_001523700), *Saccharomyces cerevisiae* (NP\_013911), *Candida dubliniensis* (XP\_002421403), and *Prunus mume* (XP\_008234835). The numbers above the branches in all of the points indicate the frequency percentage of the two branches in 1000

bootstrap samples, and the distance scale length is 0.05.

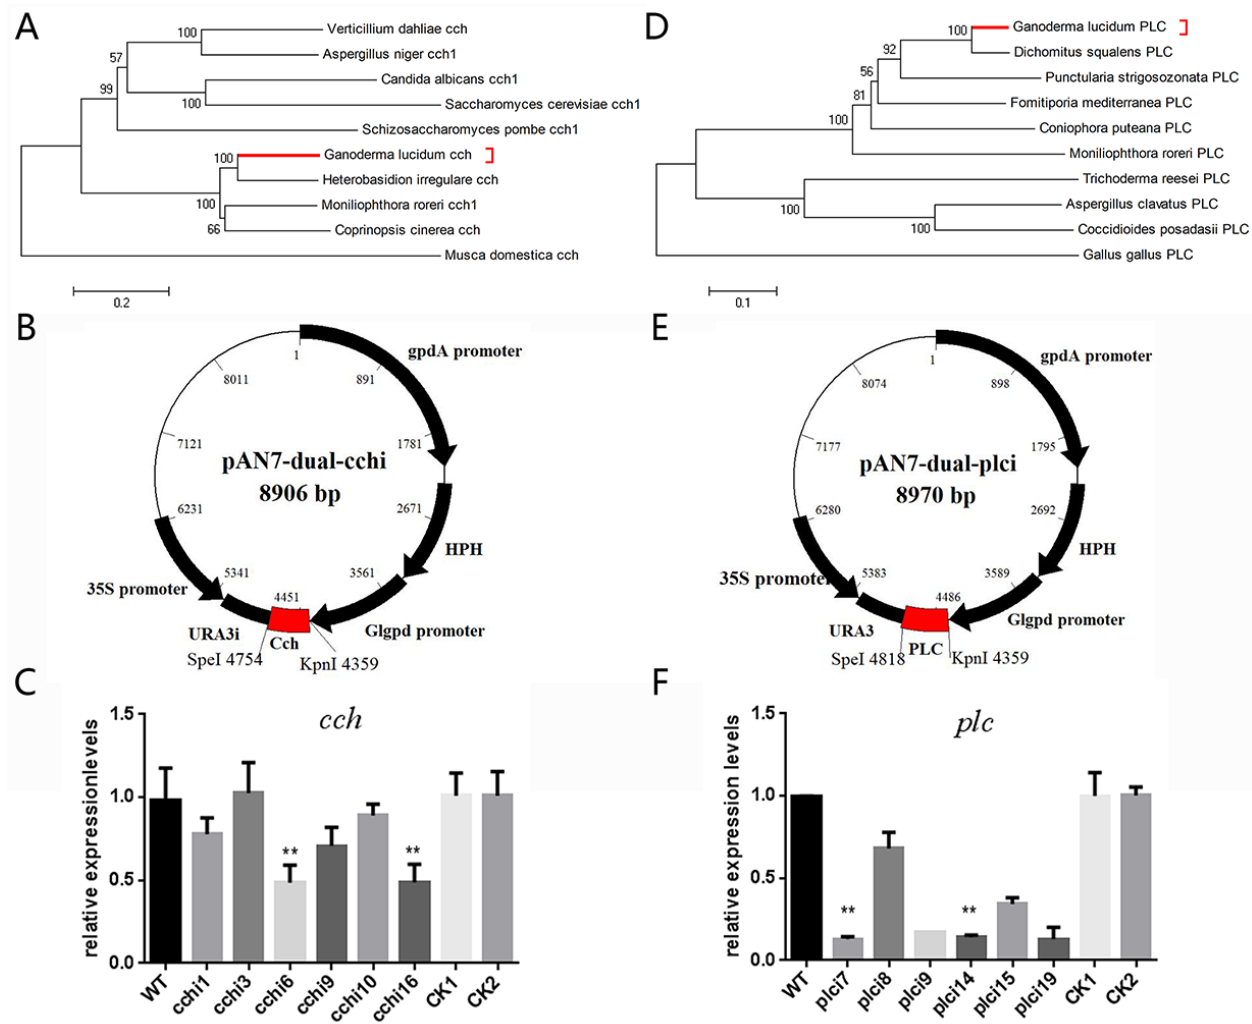

**Fig. S3** Characterization of the *G. lucidum cchi* and *plci* strains. A. Phylogenetic tree of *cch* sequences.

The GenBank accession numbers for the *cch* sequences were as follows: *Ganoderma lucidum* (GL23103), *Moniliophthora roreri* (XP\_007848898), *Heterobasidion irregulare* (XP\_009551146), *Coprinopsis cinerea* (XP\_001838182), *Aspergillus niger* (XP\_001392456), *Candida albicans* (XP\_718121), *Saccharomyces cerevisiae* (NP\_011733) and *Musca domestica* (XP\_005178247). The numbers above the branches in all of the points indicate the frequency percentage of the two branches in 1000 bootstrap samples, and the distance scale length is 0.1.

B. Construction of *cch* RNAi expression cassette plasmids. The *cch* fragment was double-digested with the restriction sites *KpnI* and *SpeI* and inserted into the plasmid pAN7-dual after *KpnI/SpeI* restriction digestion. In the plasmid, *ura3* transcription and *cch* are driven by the 35S promoter and the *gpd* promoter. C. The relative mRNA levels of *cch* in *G. lucidum*. The expression level of the *cch* gene in the WT strain was arbitrarily set to 1. D. Phylogenetic tree of *plc* sequences. The GenBank accession numbers for the *plc* sequences were as follows: included *Ganoderma lucidum* (GL20551), *Dichomitus squalens* (XP\_007367392), *Fomitiporia mediterranea* (XP\_007267331), *Gloeophyllum trabeum* (XP\_007870641), *Aspergillus niger* (XP\_001392747), *Sclerotinia sclerotiorum* (XP\_001592832), *Neosartorya fischeri* (XP\_001264434) and *Falco cherrug* (XP\_005442881). The numbers above the branches in all of the points indicate the frequency percentage of the two branches in 1000 bootstrap samples, and the distance scale length is 0.1. E. Construction of *plc* RNAi expression cassette plasmids. The *plc* fragment was double-digested with the restriction sites *KpnI* and *SpeI* and inserted into the plasmid pAN7-dual after *KpnI/SpeI* restriction digestion. In the

plasmids, *ura3* transcription and *plc* are driven by the 35S promoter and the *gpd* promoter. F. The relative mRNA levels of *plc* in *G. lucidum*. The expression level of the *plc* gene in the WT strain was arbitrarily set to 1. The values are the means  $\pm$  SD of three independent experiments. Asterisks indicate significant differences compared to WT strains (Student's t test:  $**P < 0.01$ ).

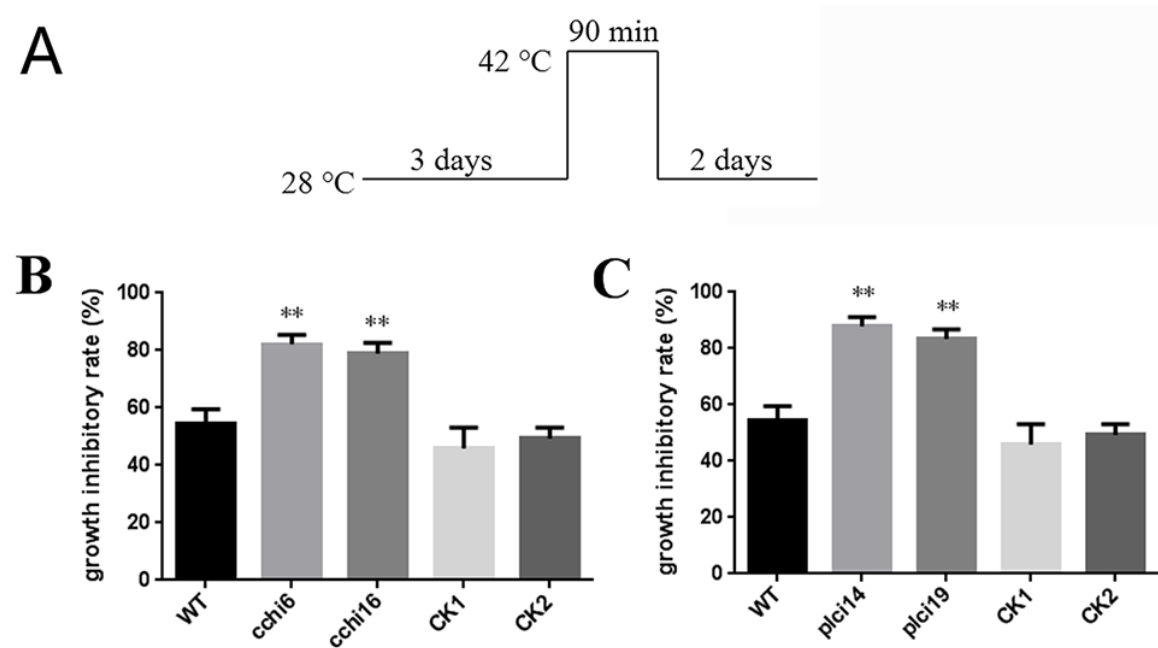

**Fig. S4** *Cch*-silenced and *plc*-silenced strains displayed thermosensitive phenotypes compared with the wild-type (WT) and empty vector (CK) strains after HS.

WT, CK1, CK2, *cch*-silenced strains (*cchi6*, *cchi16*) and *plc*-silenced strains (*plci14*, *plci19*) were cultured on PDA plates for 3 days and then exposed to 42 °C for 0 min to 120 min followed by 2 days at 28 °C. B. The mycelial growth rate of the WT, CK1, CK2 and *cch*-silenced strains (*cchi6*, *cchi16*) in  $\text{cm day}^{-1}$  was measured following 2 days of 28 °C after HS and was subjected to statistical analysis. C. The mycelial growth



rate of the WT, CK1, CK2 and *plc*-silenced strains (*plci14*, *plci19*) in  $\text{cm day}^{-1}$  was measured following 2 days of 28 °C after HS and was subjected to statistical analysis. The values are the means  $\pm$  SD of three independent experiments. Asterisks indicate significant differences compared to WT strains (Student's *t* test: \*\**P* < 0.01).

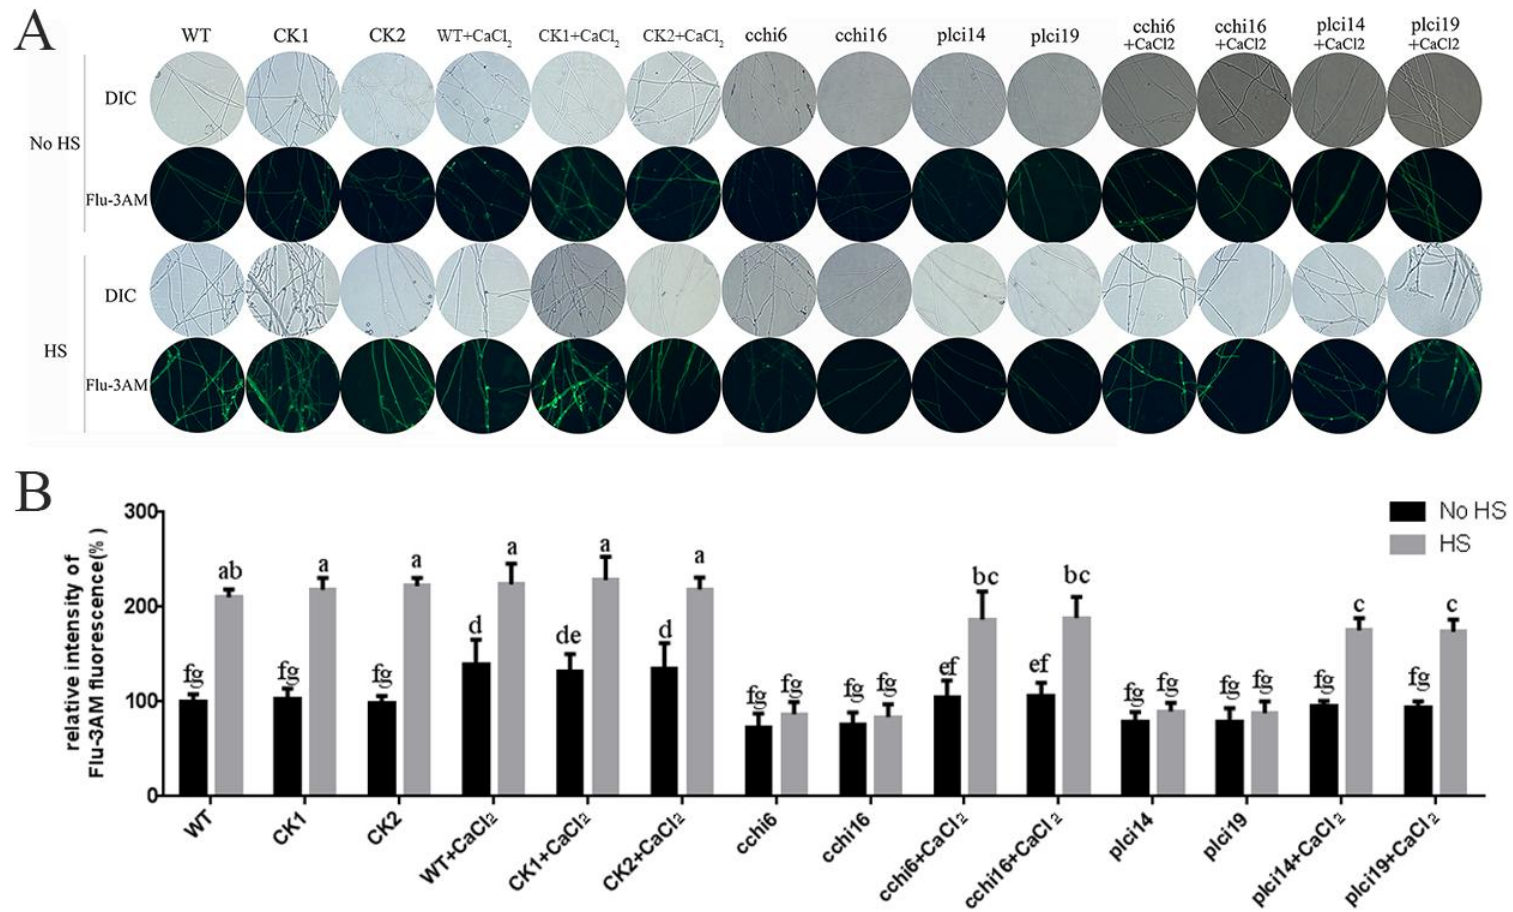

**Fig. S5** Cch and plc participate in regulating cytosolic Ca<sup>2+</sup> concentrations under HS.

A. Wild-type (WT), CK1, CK2 (transformed with the empty plasmid), *cch*-silenced strains (*cchi6*, *cchi16*) and *plc*-silenced strains (*plci14*,

plci19) were cultured on PDA plates with or without 2 mM CaCl<sub>2</sub> for 5 days and then exposed to 42 °C for 20 min. To detect cytosolic Ca<sup>2+</sup> concentrations, 50 μM Flu-3AM, a Ca<sup>2+</sup> fluorescent probe, was used, and the intensity was monitored using CLSM. Green fluorescence represents free cytosolic Ca<sup>2+</sup>. B. Changes in the Ca<sup>2+</sup> fluorescence ratio in the heat-stressed strains. The Y-axis is the Ca<sup>2+</sup> fluorescence ratio measured by CLSM, and the X-axis represents the different treatments. The values are the means ± SD of three independent experiments. Different letters indicate significant differences between the lines (*P* < 0.05, according to Duncan's multiple range test).

**Table S1 Oligonucleotide primers used**

| Primer      | Sequence (5' to 3')      | Description                                   |
|-------------|--------------------------|-----------------------------------------------|
| HSP17.4RT-F | GCCGA GCTTCCTGGTGTCA     | Detects the <i>hsp17.4</i> expression         |
| HSP17.4RT-R | GCTGCCGTA GTTTGCGTTT     |                                               |
| HSP22RT-F   | AGCCCTTCTA CACCCTCTC     | Detects <i>hsp22</i> expression               |
| HSP22RT-R   | TTCTGGTCCCTGTCCTCAT      |                                               |
| HSP70RT-F   | GCGTTCGTC TGGGGTCATA     | Detects the <i>hsp70</i> expression           |
| HSP70RT-R   | TCTTCCGTTCTCA GTGTC      |                                               |
| HSP90RT-F   | G TTCATCTCTTACCCCATCC    | Detects <i>hsp90</i> expression               |
| HSP90RT-R   | CTCTTCGTCCTCGA CTTCC     |                                               |
| SqsRT-F     | CTGCTTATTCTACCTGGTGCTACG | Detects the <i>Sqs</i> expression             |
| SqsRT-R     | GGCTTCA CGGC GA GTTTGT   |                                               |
| OscRT-F     | AGGGA GAA CCCGAA GCATT   | Detects the <i>Osc</i> expression             |
| OscRT-R     | CGTCCA CA GCGTCGCATAAC   |                                               |
| HmgrRT-F    | GTCATCCTCCTATGCCAAAC     | Detects the <i>Hmgr</i> expression            |
| HmgrRT-R    | GGGCGTA GTCGTA GTCCTTC   |                                               |
| PlcRT-F:    | CAACTTTGACGA CGTAGAGC    | Detects the <i>Phospholipase C</i> expression |
| PlcRT-R:    | GGCGTGCCCTTGAGGGACTT     |                                               |
| CchRT-F:    | GCTGGTGCTGGGTAGGA        | Detects the <i>cch</i> expression             |

|                                       |                                      |                                                            |
|---------------------------------------|--------------------------------------|------------------------------------------------------------|
| CchRT-R:                              | TCCA GTCA GGCAAATAGG                 |                                                            |
| Cchi-F                                | ACTGgttaccGGA GAA CA GCGA CA GCCCTAA |                                                            |
| Cchi-R                                | ACTGactagtGCAAATCCTACCCA GCA CCA G   | Get the fragment of <i>G. lucidum</i> cch gene             |
| Plci-F                                | GTACggtaccAAGAATCGTGGCTA CCT         |                                                            |
| Plci-R                                | GTACactagtCGGA GTTATCTGCTGAAA        | Get the fragment of <i>G. lucidum</i> Phospholipase C gene |
| MidRT-F                               | AACTTGTCCTTGCCA TCA CC               |                                                            |
| MidRT-R                               | CCAGCCATCCGTATTCTTC                  | Detects the <i>mid</i> expression                          |
| YvcRT-F                               | ATTTGTCGTCCTTATGGTTATCG              |                                                            |
| YvcRT-R                               | GGGAAACTCGTGA GCCTGAT                | Detects the <i>yvc</i> expression                          |
| Ca <sup>2+</sup> exchanger(26136)RT-F | TTGTTGA GTATCA GCGTA GGG             |                                                            |
| Ca <sup>2+</sup> exchanger(26136)RT-R | TGCGTATGGGA CCA GA GTT               | Detects the Ca <sup>2+</sup> exchanger expression          |
| Ca <sup>2+</sup> exchanger(16447)RT-F | GGGGA CCTGGTTGTTGTTAC                |                                                            |
| Ca <sup>2+</sup> exchanger(16447)RT-R | TTCAGTTCA GTTCA CTATGGA              | Detects the Ca <sup>2+</sup> exchanger expression          |
| Ca <sup>2+</sup> exchanger(26055)RT-F | GGCAA GATCA GCAA GGA GT              |                                                            |
| Ca <sup>2+</sup> exchanger(26055)RT-R | CCA GGGATA GCGTGA GTTTA              | Detects the Ca <sup>2+</sup> exchanger expression          |
| Ca <sup>2+</sup> exchanger(27830)RT-F | CCAACGCA CCA GGCA CAAT               |                                                            |
| Ca <sup>2+</sup> exchanger(27830)RT-R | ACCCGAA GA GCA CAAGCAAAG             | Detects the Ca <sup>2+</sup> exchanger expression          |
| Ca <sup>2+</sup> exchanger(24479)RT-F | AGGGCCTCAA GGTATCTC                  |                                                            |
| Ca <sup>2+</sup> exchanger(24479)RT-R | TCA CGGTGA CCA GGA GTA G             | Detects the Ca <sup>2+</sup> exchanger expression          |

|                                       |                          |                                                   |
|---------------------------------------|--------------------------|---------------------------------------------------|
| Ca <sup>2+</sup> exchanger(23942)RT-F | CCATTGTCCCGA CGCTGTT     |                                                   |
| Ca <sup>2+</sup> exchanger(23942)RT-R | GGGTCA GGGTGCGTGTAAT     | Detects the Ca <sup>2+</sup> exchanger expression |
| Ca <sup>2+</sup> pump(21462)RT-F      | TGTCACCCA CGAACCCCTTAT   |                                                   |
| Ca <sup>2+</sup> pump(21462)RT-R      | GGA GGA CCTTTGCTA GACG   | Detects the Ca <sup>2+</sup> pump expression      |
| Ca <sup>2+</sup> pump(28993)RT-F      | CGCGAATGTCCTCCCTA CT     |                                                   |
| Ca <sup>2+</sup> pump(28993)RT-R      | GCAA CACCTTCCA CCCAAT    | Detects the Ca <sup>2+</sup> pump expression      |
| Ca <sup>2+</sup> pump(21619)RT-F      | TGACGAA GAACGA GCA GAC   |                                                   |
| Ca <sup>2+</sup> pump(21619)RT-R      | TGTTGCA GACCGA GCCTATC   | Detects the Ca <sup>2+</sup> pump expression      |
| Ca <sup>2+</sup> pump(28969)RT-F      | CA GAACCA CGCA GAA GCA C |                                                   |
| Ca <sup>2+</sup> pump(28969)RT-R      | CATTCGCGGCCATA GGA GT    | Detects the Ca <sup>2+</sup> pump expression      |
| Ca <sup>2+</sup> pump(24243)RT-F      | CTCGCTATCGCCCGTCA GGT    |                                                   |
| Ca <sup>2+</sup> pump(24243)RT-R      | CCGTCCTCCTCTTTGGGTT      | Detects the Ca <sup>2+</sup> pump expression      |
| Ca <sup>2+</sup> pump(25555)RT-F      | CTTTCTGCCA GATGGATTGC    |                                                   |
| Ca <sup>2+</sup> pump(25555)RT-R      | GGGTCA GA GTGCCTGTTTT    | Detects the Ca <sup>2+</sup> pump expression      |
| Ca <sup>2+</sup> pump(29594)RT-F      | GA CGGCA GGTTGGTCTTTG    |                                                   |
| Ca <sup>2+</sup> pump(29594)RT-R      | GGCTTTGCTTGGCGGCTTCT     | Detects the Ca <sup>2+</sup> pump expression      |
| Ca <sup>2+</sup> pump(22885)RT-F      | ACAAGGGAAA GGGA GAA CA   |                                                   |
| Ca <sup>2+</sup> pump(22885)RT-R      | TGGGCA GCCATACGA GTA G   | Detects the Ca <sup>2+</sup> pump expression      |
| Ca <sup>2+</sup> pump(22533)RT-F      | GTCGCTATTGCCCTTTCCA      | Detects the Ca <sup>2+</sup> pump expression      |

|                                  |                            |                                                                                                       |
|----------------------------------|----------------------------|-------------------------------------------------------------------------------------------------------|
| Ca <sup>2+</sup> pump(22533)RT-R | AGCCA GGGAGTCCATGAGA       |                                                                                                       |
| Ca <sup>2+</sup> pump(30508)RT-F | CGCTCAGCAATCA CAAAGT       |                                                                                                       |
| Ca <sup>2+</sup> pump(30508)RT-R | TATGCGGAGGGTGA GAAAA       | Detects the Ca <sup>2+</sup> pump expression                                                          |
| Ca <sup>2+</sup> pump(25712)RT-F | TATCCCTCATCCAGTTCACC       |                                                                                                       |
| Ca <sup>2+</sup> pump(25712)RT-R | CGATACTTGCCAGGACTTTCT      | Detects the Ca <sup>2+</sup> pump expression                                                          |
| Ca <sup>2+</sup> pump(27118)RT-F | TACAGGCATACTTCATCTC        |                                                                                                       |
| Ca <sup>2+</sup> pump(27118)RT-R | ATACCATTGACGGAGCACTT       | Detects the Ca <sup>2+</sup> pump expression                                                          |
| CrzRT-F                          | ACGCCCTTCCTATGCGAGTG       |                                                                                                       |
| CrzRT-R                          | AGGAAACGGCGTCAGTAGC        | Detects the Calcineurin-responsive zinc finger transcription factor expression                        |
| CNA1RT-F                         | AAGTGTACGATGCGTGTATCAAGTCC |                                                                                                       |
| CNA1RT-R                         | CTGGTTCCTCAAA GCGGTTTATGT  | Detects the <i>CNA1</i> expression                                                                    |
| CNA2RT-F                         | GCTCTGCTCGCTTGCCATAC       |                                                                                                       |
| CNA2RT-R                         | CCCTTGCCCTCTTCGGATT        | Detects the <i>CNA2</i> expression                                                                    |
| CNBRT-F                          | ATGGAGGAGGCA CGGTAGA       |                                                                                                       |
| CNBRT-R                          | CTTTAGGACGAGGAACAGC        | Detects the <i>CNB</i> expression                                                                     |
| CamRT-F                          | CCCCGAGTTCCTGACGATG        |                                                                                                       |
| CamRT-R                          | AGCTTCTCGCCGAGGTTGG        | Detects the proteins that undergoes conformational change upon binding to Ca <sup>2+</sup> expression |
| CamK1RT-F                        | GTCGATATGTGGTCAACAGGGATT   |                                                                                                       |
| CamK1RT-R                        | ACGGTCGGTGGGAA GTCA GC     | Detects the <i>CamK1</i> expression                                                                   |

|                  |                        |                                            |
|------------------|------------------------|--------------------------------------------|
| CamK2RT-F        | GAAGTTCCACCTCTTGACGG   |                                            |
| CamK2RT-R        | TCACCACGGATGATAGCC     | Detects the <i>CamK2</i> expression        |
| CamK3RT-F        | TATCAAGCCCGAGAACCTG    |                                            |
| CamK3RT-R        | TGTAGTGTCCACGAGCAACC   | Detects the <i>CamK3</i> expression        |
| CABPRT-F         | AGATGCTTCAGATCGTCCAGTC |                                            |
| CABPRT-R         | CTTCCCTCCACAAACTCCTCGT | Detects the <i>CABP</i> expression         |
| calreticulinRT-F | TAGACGAGCCATTCAAA      |                                            |
| calreticulinRT-R | CTTTCACAGGAGCAACGATA   | Detects the <i>calreticulin</i> expression |

---
